# Supplementary material for: Leveraging deep contrastive learning for semantic interaction
Source: PeerJ journal article supplement (doi:10.7717/peerj-cs.925), 2022-04-08
Supplement: supp_figures.pdf [file supp_figures.pdf]

2 **1 SUPPLEMENTARY FIGURES**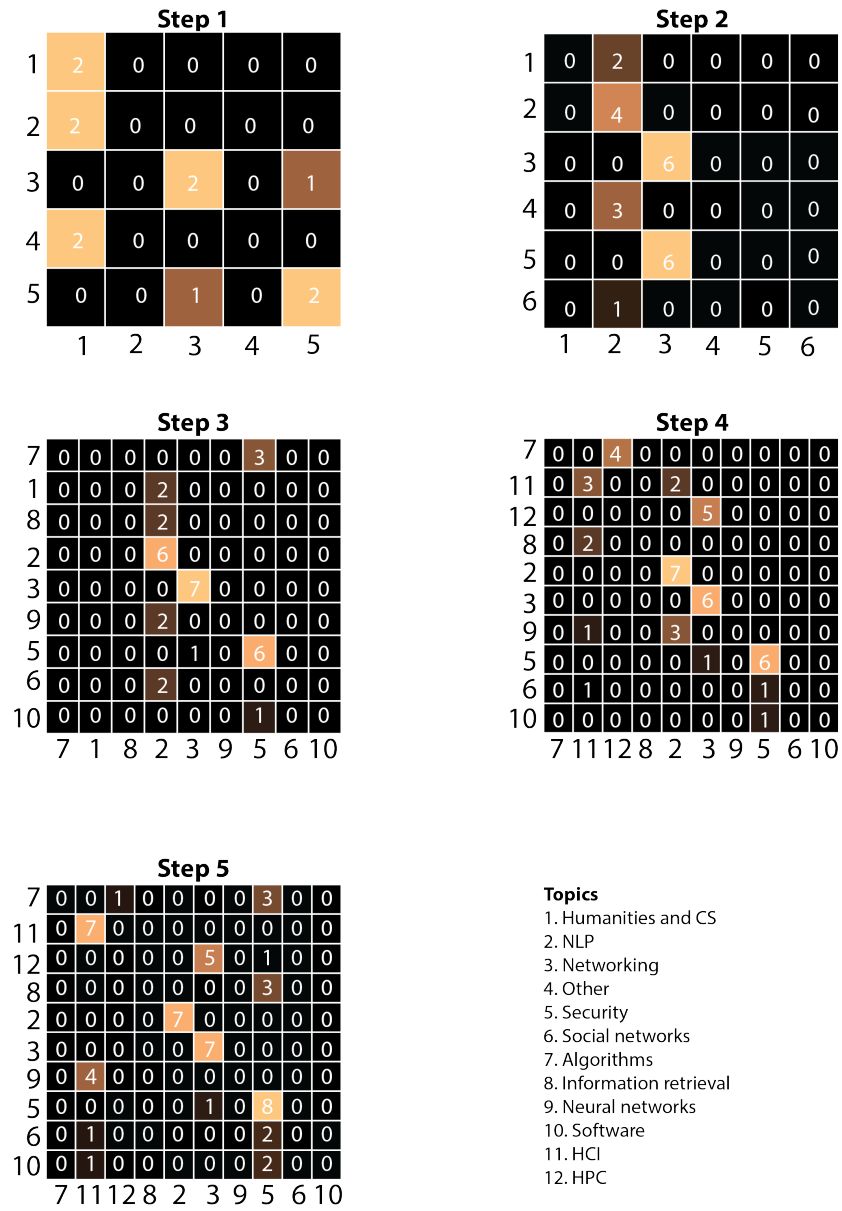**Figure 1.** User Study 6.

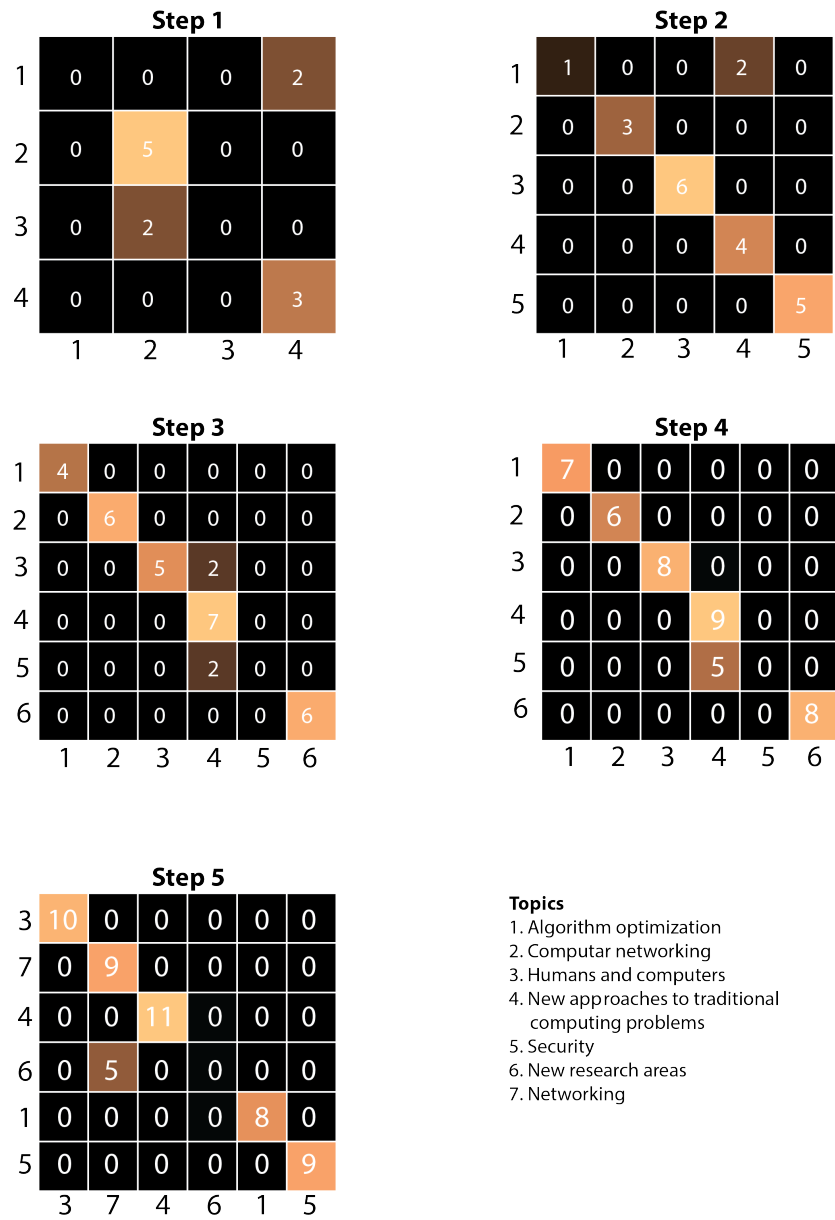

Figure 2. User Study 7.

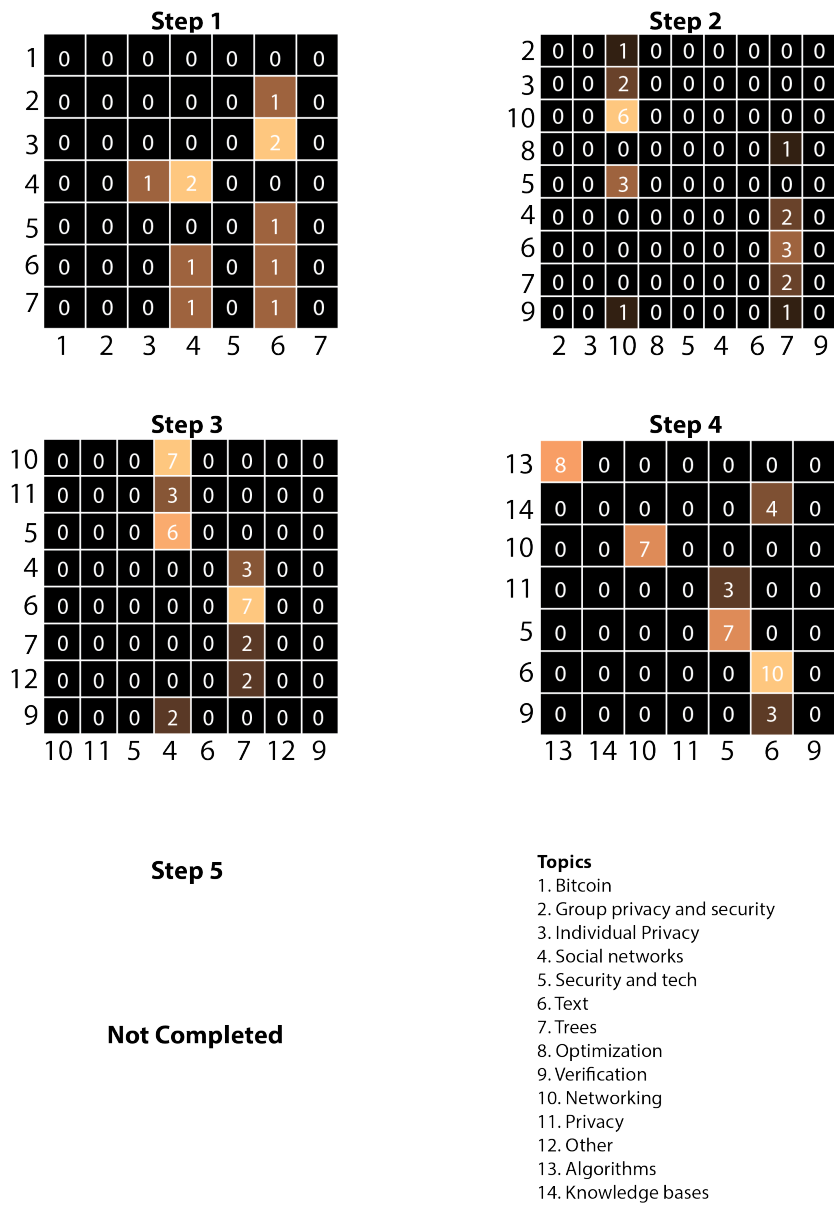

Figure 3. User Study 8.

**Step 1**

|   |   |   |   |
|---|---|---|---|
| 1 | 2 | 1 | 0 |
| 2 | 1 | 4 | 0 |
| 3 | 0 | 4 | 0 |
|   | 1 | 2 | 3 |

**Step 2**

|   |   |   |   |   |   |   |
|---|---|---|---|---|---|---|
| 1 | 6 | 0 | 0 | 0 | 0 | 0 |
| 3 | 0 | 6 | 0 | 0 | 0 | 0 |
| 4 | 0 | 0 | 0 | 1 | 0 | 0 |
| 5 | 0 | 0 | 0 | 2 | 0 | 0 |
| 6 | 0 | 2 | 0 | 0 | 0 | 0 |
| 2 | 1 | 0 | 0 | 0 | 0 | 4 |
|   | 1 | 3 | 4 | 5 | 6 | 2 |

**Step 3**

|   |   |   |   |   |   |   |   |
|---|---|---|---|---|---|---|---|
| 1 | 0 | 0 | 0 | 0 | 2 | 0 | 0 |
| 3 | 0 | 8 | 0 | 0 | 0 | 0 | 0 |
| 4 | 0 | 0 | 8 | 0 | 0 | 0 | 0 |
| 5 | 0 | 0 | 0 | 0 | 2 | 0 | 0 |
| 6 | 0 | 0 | 0 | 0 | 5 | 0 | 0 |
| 2 | 0 | 0 | 2 | 0 | 0 | 0 | 0 |
| 7 | 0 | 1 | 3 | 0 | 1 | 0 | 0 |
|   | 1 | 3 | 4 | 5 | 6 | 2 | 7 |

**Step 4**

|   |   |   |   |   |   |   |   |   |
|---|---|---|---|---|---|---|---|---|
| 1 | 0 | 0 | 0 | 0 | 7 | 0 | 0 | 0 |
| 3 | 0 | 8 | 0 | 0 | 0 | 0 | 0 | 0 |
| 4 | 0 | 0 | 8 | 0 | 0 | 0 | 0 | 0 |
| 5 | 0 | 0 | 0 | 0 | 3 | 0 | 0 | 0 |
| 6 | 0 | 0 | 0 | 0 | 7 | 0 | 0 | 0 |
| 2 | 0 | 0 | 3 | 0 | 0 | 0 | 0 | 0 |
| 7 | 3 | 1 | 1 | 0 | 0 | 0 | 0 | 0 |
| 8 | 0 | 0 | 0 | 0 | 0 | 0 | 0 | 2 |
|   | 1 | 3 | 4 | 5 | 6 | 2 | 7 | 8 |

**Step 5**

|   |   |   |   |   |   |   |   |   |   |
|---|---|---|---|---|---|---|---|---|---|
| 1 | 0 | 0 | 0 | 0 | 0 | 7 | 0 | 0 | 0 |
| 3 | 0 | 0 | 0 | 0 | 0 | 2 | 0 | 0 | 0 |
| 4 | 0 | 0 | 8 | 0 | 0 | 0 | 0 | 0 | 0 |
| 5 | 0 | 0 | 0 | 9 | 0 | 0 | 0 | 0 | 0 |
| 6 | 0 | 0 | 0 | 0 | 0 | 4 | 0 | 0 | 0 |
| 2 | 0 | 0 | 0 | 0 | 0 | 8 | 0 | 0 | 0 |
| 7 | 0 | 0 | 0 | 4 | 0 | 0 | 0 | 0 | 0 |
| 8 | 0 | 0 | 0 | 1 | 0 | 0 | 0 | 6 | 0 |
| 9 | 0 | 0 | 0 | 0 | 0 | 3 | 0 | 0 | 0 |
|   | 1 | 3 | 4 | 5 | 6 | 2 | 7 | 8 | 9 |

- Topics**
1. NLP
  2. Networking
  3. Security
  4. Algorithms and networks
  5. Algorithms
  6. Computation
  7. Deep Learning
  8. Systems
  9. HCI

**Figure 4.** Use Study 9.

**Step 1**

|   |   |   |   |   |   |
|---|---|---|---|---|---|
| 1 | 0 | 1 | 0 | 0 | 0 |
| 2 | 0 | 1 | 0 | 1 | 0 |
| 3 | 0 | 2 | 0 | 0 | 0 |
| 4 | 0 | 1 | 1 | 0 | 0 |
| 5 | 0 | 2 | 0 | 0 | 0 |
|   | 1 | 2 | 3 | 4 | 5 |

**Step 2**

|   |   |   |   |   |   |   |
|---|---|---|---|---|---|---|
| 1 | 4 | 1 | 0 | 0 | 0 | 0 |
| 2 | 0 | 4 | 0 | 0 | 0 | 0 |
| 3 | 0 | 2 | 0 | 0 | 0 | 0 |
| 4 | 0 | 0 | 0 | 0 | 0 | 2 |
| 5 | 0 | 2 | 0 | 0 | 0 | 0 |
| 6 | 0 | 0 | 0 | 0 | 0 | 5 |
|   | 1 | 2 | 3 | 4 | 5 | 6 |

**Step 3**

|   |   |   |   |   |   |   |
|---|---|---|---|---|---|---|
| 1 | 0 | 0 | 0 | 0 | 2 | 0 |
| 2 | 0 | 7 | 0 | 0 | 0 | 0 |
| 3 | 0 | 0 | 6 | 0 | 0 | 0 |
| 4 | 0 | 3 | 0 | 0 | 0 | 0 |
| 5 | 0 | 0 | 0 | 0 | 6 | 0 |
| 6 | 0 | 0 | 0 | 0 | 0 | 6 |
|   | 1 | 2 | 3 | 4 | 5 | 6 |

**Step 4**

|   |   |    |   |    |   |
|---|---|----|---|----|---|
| 1 | 7 | 0  | 0 | 0  | 0 |
| 2 | 0 | 10 | 0 | 0  | 0 |
| 3 | 3 | 2  | 0 | 0  | 0 |
| 5 | 0 | 0  | 0 | 12 | 0 |
| 6 | 0 | 0  | 0 | 0  | 6 |
|   | 1 | 2  | 3 | 5  | 6 |

**Step 5**

|   |   |    |   |    |   |
|---|---|----|---|----|---|
| 1 | 9 | 0  | 0 | 0  | 0 |
| 2 | 0 | 12 | 0 | 0  | 0 |
| 3 | 0 | 4  | 4 | 0  | 0 |
| 5 | 0 | 0  | 0 | 17 | 0 |
| 6 | 0 | 0  | 0 | 3  | 3 |
|   | 1 | 2  | 3 | 5  | 6 |

- Topics**
1. Data mining
  2. HCI
  3. Networking
  4. Software eng. / networking
  5. Software eng.
  6. AI / Data Science

**Figure 5.** User Study 10.

**Step 1**

|   |   |   |   |   |   |
|---|---|---|---|---|---|
| 1 | 3 | 0 | 0 | 0 | 0 |
| 2 | 0 | 0 | 0 | 0 | 1 |
| 3 | 1 | 0 | 0 | 0 | 0 |
| 4 | 1 | 0 | 0 | 0 | 0 |
| 5 | 3 | 0 | 0 | 0 | 0 |
|   | 1 | 2 | 3 | 4 | 5 |

**Step 2**

|   |   |   |   |   |   |   |
|---|---|---|---|---|---|---|
| 6 | 0 | 0 | 0 | 3 | 0 | 0 |
| 1 | 0 | 3 | 0 | 0 | 0 | 0 |
| 2 | 1 | 0 | 0 | 0 | 0 | 0 |
| 7 | 0 | 0 | 0 | 6 | 0 | 0 |
| 3 | 0 | 0 | 0 | 0 | 4 | 0 |
| 5 | 0 | 0 | 0 | 0 | 0 | 3 |
|   | 6 | 1 | 2 | 7 | 3 | 5 |

**Step 3**

|   |   |   |   |    |   |   |
|---|---|---|---|----|---|---|
| 6 | 1 | 0 | 0 | 4  | 0 | 0 |
| 1 | 0 | 3 | 0 | 0  | 0 | 0 |
| 2 | 0 | 0 | 1 | 1  | 0 | 0 |
| 7 | 0 | 0 | 0 | 11 | 0 | 0 |
| 3 | 0 | 0 | 0 | 0  | 5 | 0 |
| 5 | 0 | 0 | 0 | 0  | 0 | 4 |
|   | 6 | 1 | 2 | 7  | 3 | 5 |

**Step 4**

|   |   |   |   |    |   |   |
|---|---|---|---|----|---|---|
| 6 | 6 | 0 | 0 | 1  | 0 | 0 |
| 1 | 0 | 3 | 0 | 0  | 0 | 0 |
| 2 | 0 | 0 | 0 | 2  | 0 | 0 |
| 7 | 0 | 0 | 0 | 14 | 0 | 0 |
| 3 | 0 | 0 | 0 | 0  | 8 | 0 |
| 5 | 0 | 0 | 0 | 0  | 0 | 6 |

**Step 5**

|   |   |   |   |    |   |   |   |   |
|---|---|---|---|----|---|---|---|---|
| 6 | 9 | 0 | 0 | 0  | 0 | 0 | 0 | 0 |
| 1 | 0 | 3 | 0 | 0  | 0 | 0 | 0 | 0 |
| 2 | 0 | 0 | 1 | 0  | 0 | 0 | 0 | 1 |
| 7 | 0 | 0 | 0 | 16 | 0 | 0 | 0 | 0 |
| 3 | 0 | 0 | 0 | 0  | 5 | 0 | 0 | 0 |
| 5 | 0 | 0 | 0 | 0  | 0 | 4 | 0 | 0 |
| 8 | 0 | 0 | 0 | 0  | 0 | 0 | 7 | 0 |
| 9 | 0 | 0 | 0 | 0  | 0 | 0 | 0 | 6 |
|   | 6 | 1 | 2 | 7  | 3 | 5 | 8 | 9 |

- Topics**
1. Applications
  2. Data
  3. Miscellaneous
  4. Network science
  5. Tools
  6. Algorithms
  7. ML
  8. Networking
  9. Security

**Figure 6.** User Study 11.

**Step 1**

|   |   |   |   |   |   |   |
|---|---|---|---|---|---|---|
| 1 | 0 | 0 | 0 | 0 | 0 | 1 |
| 2 | 0 | 0 | 0 | 0 | 0 | 2 |
| 3 | 0 | 0 | 0 | 0 | 0 | 2 |
| 4 | 0 | 0 | 0 | 0 | 0 | 1 |
| 5 | 0 | 0 | 0 | 0 | 0 | 1 |
| 6 | 0 | 0 | 0 | 0 | 0 | 2 |
|   | 1 | 2 | 3 | 4 | 5 | 6 |

Step 2

|    |   |   |   |   |   |   |   |   |    |
|----|---|---|---|---|---|---|---|---|----|
| 2  | 0 | 0 | 0 | 0 | 0 | 0 | 0 | 2 | 0  |
| 7  | 0 | 1 | 0 | 0 | 0 | 0 | 0 | 0 | 0  |
| 3  | 0 | 0 | 0 | 0 | 0 | 0 | 0 | 2 | 0  |
| 4  | 0 | 0 | 0 | 0 | 0 | 0 | 0 | 0 | 1  |
| 8  | 0 | 0 | 0 | 0 | 0 | 0 | 0 | 2 | 0  |
| 9  | 0 | 0 | 0 | 0 | 0 | 1 | 0 | 3 | 0  |
| 5  | 0 | 0 | 0 | 0 | 0 | 0 | 0 | 1 | 0  |
| 6  | 0 | 0 | 0 | 0 | 0 | 0 | 0 | 5 | 0  |
| 10 | 0 | 0 | 0 | 0 | 0 | 0 | 0 | 0 | 2  |
|    | 2 | 7 | 3 | 4 | 8 | 9 | 5 | 6 | 10 |

Step 3

|    |   |   |   |   |   |   |   |   |    |    |    |
|----|---|---|---|---|---|---|---|---|----|----|----|
| 2  | 0 | 0 | 0 | 0 | 0 | 0 | 0 | 0 | 3  | 0  |    |
| 7  | 0 | 3 | 0 | 0 | 0 | 0 | 0 | 0 | 0  | 0  |    |
| 3  | 0 | 0 | 0 | 0 | 0 | 0 | 0 | 0 | 2  | 0  |    |
| 4  | 0 | 0 | 0 | 0 | 0 | 0 | 0 | 0 | 0  | 1  |    |
| 8  | 0 | 2 | 0 | 0 | 0 | 0 | 0 | 0 | 1  | 0  |    |
| 9  | 0 | 1 | 0 | 0 | 0 | 0 | 0 | 0 | 0  | 0  |    |
| 5  | 1 | 0 | 0 | 0 | 0 | 1 | 0 | 0 | 4  | 0  |    |
| 6  | 0 | 0 | 0 | 0 | 0 | 0 | 0 | 0 | 1  | 0  |    |
| 10 | 0 | 0 | 0 | 0 | 0 | 0 | 0 | 0 | 0  | 0  |    |
| 11 | 0 | 0 | 0 | 0 | 0 | 0 | 0 | 0 | 7  | 0  |    |
| 12 | 0 | 0 | 0 | 0 | 0 | 0 | 0 | 0 | 0  | 2  |    |
|    | 2 | 7 | 3 | 4 | 8 | 9 | 5 | 6 | 10 | 11 | 12 |

**Step 4**

|    |   |   |   |   |   |   |   |   |    |    |    |
|----|---|---|---|---|---|---|---|---|----|----|----|
| 2  | 0 | 0 | 0 | 0 | 1 | 0 | 0 | 0 | 0  | 0  | 0  |
| 7  | 0 | 0 | 0 | 0 | 0 | 0 | 0 | 0 | 0  | 3  | 0  |
| 3  | 0 | 0 | 5 | 0 | 0 | 0 | 0 | 0 | 0  | 0  | 0  |
| 4  | 0 | 0 | 0 | 0 | 0 | 0 | 0 | 0 | 0  | 2  | 0  |
| 8  | 0 | 0 | 0 | 0 | 2 | 0 | 0 | 0 | 0  | 0  | 0  |
| 9  | 0 | 0 | 2 | 0 | 0 | 4 | 0 | 0 | 0  | 0  | 0  |
| 5  | 0 | 0 | 1 | 0 | 0 | 0 | 0 | 0 | 0  | 0  | 0  |
| 6  | 0 | 0 | 0 | 0 | 0 | 0 | 5 | 0 | 0  | 0  | 0  |
| 10 | 0 | 0 | 0 | 0 | 0 | 0 | 0 | 0 | 1  | 0  | 0  |
| 11 | 0 | 0 | 0 | 0 | 0 | 0 | 0 | 0 | 0  | 12 | 0  |
| 12 | 0 | 0 | 0 | 0 | 0 | 0 | 0 | 0 | 0  | 0  | 2  |
|    | 2 | 7 | 3 | 4 | 8 | 9 | 5 | 6 | 10 | 11 | 12 |

**Step 5**

|    |   |   |   |   |   |   |   |    |    |    |
|----|---|---|---|---|---|---|---|----|----|----|
| 2  | 0 | 0 | 0 | 4 | 0 | 0 | 0 | 0  | 0  | 0  |
| 7  | 0 | 6 | 0 | 0 | 0 | 0 | 0 | 0  | 0  | 0  |
| 3  | 0 | 0 | 0 | 2 | 0 | 0 | 0 | 0  | 0  | 0  |
| 4  | 0 | 0 | 0 | 5 | 0 | 0 | 0 | 0  | 0  | 0  |
| 8  | 0 | 0 | 0 | 0 | 8 | 0 | 0 | 0  | 0  | 0  |
| 9  | 0 | 2 | 0 | 0 | 2 | 0 | 0 | 0  | 0  | 0  |
| 5  | 0 | 0 | 0 | 0 | 0 | 6 | 0 | 0  | 0  | 0  |
| 6  | 0 | 0 | 0 | 0 | 0 | 0 | 0 | 1  | 0  | 0  |
| 10 | 0 | 0 | 0 | 0 | 0 | 0 | 0 | 14 | 0  | 0  |
| 11 | 0 | 0 | 0 | 0 | 0 | 0 | 0 | 0  | 2  | 0  |
|    | 2 | 7 | 3 | 4 | 8 | 9 | 5 | 6  | 10 | 11 |

#### Topics

1. Children and CS education
2. Communication
3. Data
4. Humans and the environment
5. Scientific research
6. Testing and optimization
7. Computer algorithms
8. Information security
9. Machine Learning
10. Wearable tech
11. Language
12. Tech and crime

**Figure 7.** User Study 12.

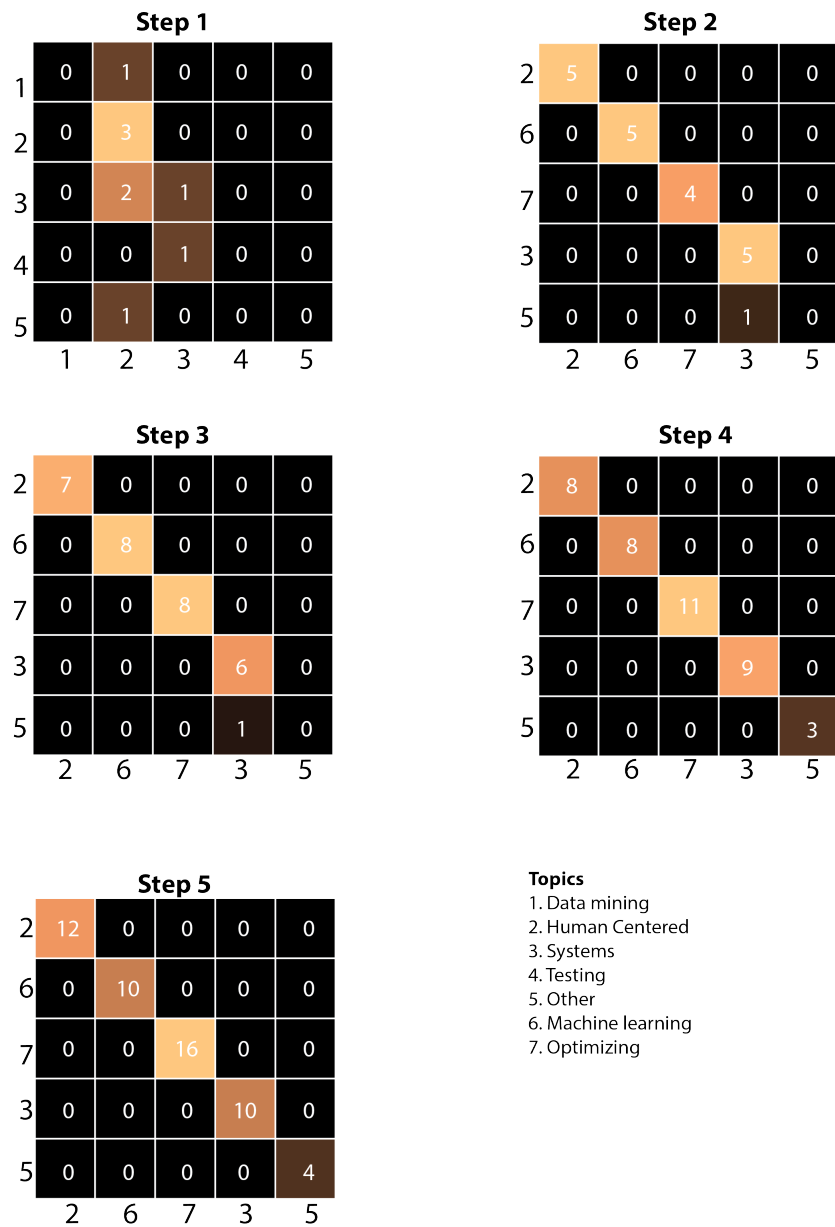

**Figure 8.** User Study 13.



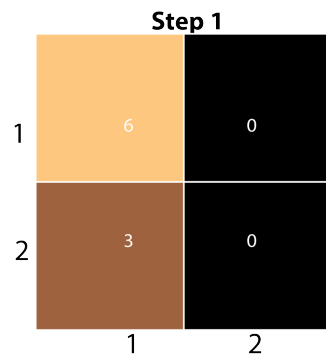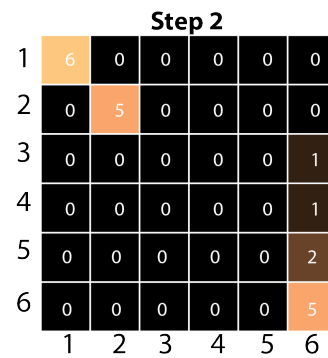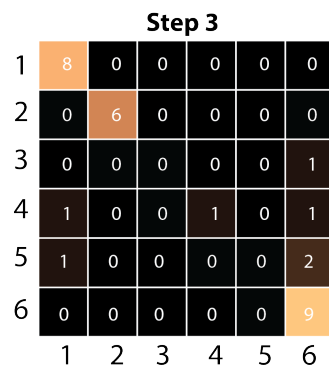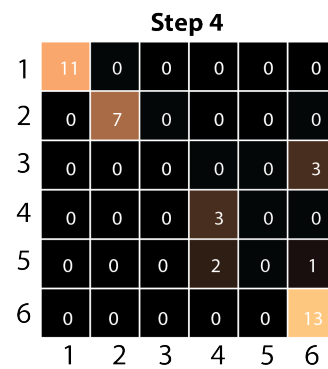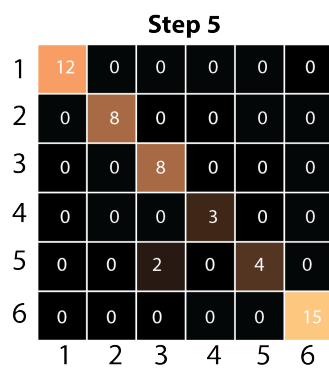

- Topics**
1. General Software
  2. Human Related
  3. IT related
  4. Unknown
  5. Algorithms
  6. Strategy

**Figure 9.** User Study 14.
